# Supplementary material for: Endemic plants of Crete in electronic trade and wildlife tourism: current patterns and implications for conservation
Source: J Biol Res (Thessalon). 2019 Oct 30;26:10. doi: 10.1186/s40709-019-0104-z (PMC6822446; doi:10.1186/s40709-019-0104-z)
Supplement: Supplementary file 3 — Additional file 3. Endemic taxa of Crete that are traded by nurseries via the internet or advertised by tourist agencies to attract visitors. [file 40709_2019_104_MOESM3_ESM.docx]

**Additional file 3.** Endemic taxa of Crete that are traded by nurseries via the internet or advertised by tourist agencies to attract visitors. Given are the numbers of these nurseries and agencies and also the number of countries (in parentheses) where these are located. For the taxa that have been assessed, the latest IUCN extinction risk assignment is given in brackets. Numbers as superscripts to the left of taxa correspond to the sources for current [EN: Endangered, VU: Vulnerable, NT: Near Threatened] and older [R: Rare] IUCN extinction risk assignments; these are 1 = Kozlowski et al., 2012 [55]; 2 = Bilz et al., 2011 [54]; 3 = Phitos et al., 2009 [53]; 4 = Walter and Gillett, 1998 [52]; 5 = Phitos et al., 1995 [51]. Marked with ‘*’ are bulbous/tuberous plants (geophytes), with ‘D’ are taxa included in the Annex II of Directive 92/43/EEC, with ‘B’ are taxa included in Bern Convention, with ‘C’ are taxa included in CITES, and with ‘P’ taxa included in the Greek Presidential Decree 67/1981. The symbol ‘-’ signifies absence of the taxon from the respective list of nurseries or of tourist agencies.

| **Cretan endemic plants** | **Number of nurseries (countries) involved** | **Number of tourist agencies (countries) involved** |
| --- | --- | --- |
| **Amaryllidaceae** |  |  |
| **Allium circinnatum* Sieber subsp*. circinnatum* (P) | - | 1 (1) |
| **Apiaceae** |  |  |
| *Ferulago thyrsiflora* (Sm.) W. D. J. Koch (P) | - | 1 (1) |
| **Araceae** |  |  |
| **Arum idaeum* Coustur. & Gand. | 1 (1) | 2 (1) |
| *2*Biarum davisii* Turrill [NT] (P) | 3 (2) | - |
| *4*Biarum tenuifolium* subsp*. idomenaeum* P. C. Boyce & Athanasiou [R] | 1(1) | - |
| **Asparagaceae** |  |  |
| *3*Bellevalia brevipedicellata* Turrill [EN] (P) | 2 (2) | - |
| **Muscari spreitzenhoferi* (Heldr. ex Osterm.) H. R. Wehrh. | 4 (2) | 4 (1) |
| **Scilla nana* subsp. *nana* (Schult. & Schult. f.) Speta (P) | - | 2 (2) |
| **Asteraceae** |  |  |
| *Centaurea idaea* Boiss. & Heldr. | - | 1 (1) |
| *3Helichrysum heldreichii* Boiss. [NT] (P) | 3 (1) | - |
| **Boraginaceae** |  |  |
| *4Anchusa cespitosa* Lam. [R] (P) | 2 (2) | 1 (1) |
| **Brassicaceae** |  |  |
| *Draba cretica* Boiss. & Heldr. | 2 (2) | - |
| *Erysimum mutabile* Boiss. & Heldr. | 6 (3) | - |
| *Erysimum raulinii* Boiss. | - | 1 (1) |
| *Ricotia cretica* Boiss. & Heldr. | - | 3 (1) |
| **Campanulaceae** |  |  |
| *4Campanula cretica* (A. DC.) D. Dietr. [R] (P) | 3 (3) | - |
| *Campanula tubulosa* Lam. | - | 4 (1) |
| *Petromarula pinnata* (L.) A. DC. | 5 (3) | 5 (1) |
| **Caryophyllaceae** |  |  |
| *Cerastium scaposum* Boiss. & Heldr. subsp. *scaposum* | - | 2 (1) |
| *4Dianthus fruticosus* subsp*. creticus* (Tausch) Runemark [R] (P) | - | 1 (1) |
| *3Dianthus xylorrhizus* Boiss. & Heldr. [VU] (P) | - | 1 (1) |
| **Colchicaceae** |  |  |
| **Colchicum cretense* Greuter | 1(1) | - |
| **Euphorbiaceae** |  |  |
| *3Euphorbia sultan-hassei* Strid & al. [NT] | - | 1(1) |
| **Fabaceae** |  |  |
| *Ebenus cretica* L. | 2 (2) | 4 (1) |
| **Fumariaceae** |  |  |
| *4Corydalis uniflora* (Sieber) Nyman [R] (P) | - | 2 (1) |
| **Hypericaceae** |  |  |
| *Hypericum trichocaulon* Boiss. & Heldr. (probably *H. kelleri* Bald. in UK nurseries) | 2 (2) | - |
| **Iridaceae** |  |  |
| *4*Crocus oreocreticus* B. L. Burtt [R] (P) | 3 (3) | - |
| **Crocus sieberi* J. Gay | - | 2(2) |
| **Lamiaceae** |  |  |
| *4Calamintha cretica* (L.) Lam. [R] (P) | 3 (3) | - |
| *2Origanum dictamnus* L. [NT] (D, B, P) | 7 (5) | 1 (1) |
| *Origanum microphyllum* (Benth.) Vogel | 3 (3) | - |
| *Phlomis lanata* Willd. (P) | 8 (4) | 1 (1) |
| *Scutellaria sieberi* Benth. | - | 4 (1) |
| *Sideritis syriaca* L. subsp*. syriaca* | 3 (3) | - |
| *4Teucrium alpestre* Sm. [R] | - | 1 (1) |
| **Liliaceae** |  |  |
| *Fritillaria messanensis* subsp*. sphaciotica* (Gand.) Kamari & Phitos | 1 (1) | 1 (1) |
| **Tulipa bakeri* A. D. Hall (P) | 14 (4) | 4 (2) |
| **Tulipa cretica* Boiss. & Heldr. (P) | 3 (1) | 2 (2) |
| *4*Tulipa doerfleri* Gand. [VU] (P) | - | 7 (2) |
| **Orchidaceae** |  |  |
| *Anacamptis papilionacea* subsp*. alibertis* (G. Kretzschmar & H. Kretzschmar) H. Kretzschmar & al. (P) | - | 1 (1) |
| *2Cephalanthera cucullata* Boiss. & Heldr. [EN] (D, B, P) | - | 2 (2) |
| *Himantoglossum samariense* C. Alibertis & A. Alibertis (P) | - | 1 (1) |
| *2Orchis sitiaca* (Renz) P. Delforge [EN] (P) | - | 1 (1) |
| **Plumbaginaceae** |  |  |
| *5Acantholimon androsaceum* (Jaub. & Spach) Boiss. [VU] | 3 (3) | - |
| **Primulaceae** |  |  |
| **Cyclamen confusum* (Grey-Wilson) Culham & al. (C) | 4 (2) | - |
| **Cyclamen graecum* subsp*. candicum* Ietsw. ex Grey-Wilson (C) | 3 (1) | - |
| **Ranunculaceae** |  |  |
| *Adonis cretica* (Huth) Runemark in Strid & Tan | - | 1 (1) |
| *4Ranunculus cupreus* Boiss. & Heldr. [VU] (P) | - | 1 (1) |
| **Rosaceae** |  |  |
| *4Sanguisorba cretica* Hayek [R] (P) | - | 1 (1) |
| **Rubiaceae** |  |  |
| *Asperula pubescens* (Willd.) Ehrend. & Schönb.-Tem. | - | 1(1) |
| **Scrophulariaceae** |  |  |
| **Verbascum arcturus* L. | 5 (5) | 6 (2) |
| **Ulmaceae** |  |  |
| *1Zelkova abelicea* (Lam.) Boiss. [EN] (D, B, P) | 2 (1) | 3 (1) |
| **Violaceae** |  |  |
| *Viola alba* subsp. *cretica* (Boiss. & Heldr.) Marcussen (P) | - | 1 (1) |
